## Title: Overcrowding and Exposure to Secondhand Smoke Increase Risk for COVID-19 Infection Among Latinx Families in Greater San Francisco Bay Area

Andrea DeCastro Mendez, BA\*<sup>1,2</sup>, Milagro Escobar, BA\*<sup>1,2</sup>, Maria Romero<sup>1,2</sup>, Janet M. Wojcicki, PhD MPH MAS<sup>1,2</sup>

\*These authors contributed equally to the manuscript

<sup>1</sup> Division of Pediatric Gastroenterology, Hepatology and Nutrition, Department of Pediatrics, University of California, San Francisco, San Francisco, California

<sup>2</sup> Department of Epidemiology and Biostatistics, University of California, San Francisco, San Francisco, California

Address for Correspondence: Janet M. Wojcicki, 550 16<sup>th</sup> Street, 4<sup>th</sup> Floor San Francisco CA 94134-0136

[Janet.wojcicki@ucsf.edu](mailto:Janet.wojcicki@ucsf.edu)

### **Abstract**

Background: The novel coronavirus (COVID-19) has disproportionately impacted the Latinx community in the United States. Environmental risk factors, including community level pollution burden and exposure to smoking and secondhand smoke, have not been evaluated in relation to risk for infection with COVID-19.

Methods: We evaluated self-reported infection rates of COVID-19 in three, preexisting, longitudinal, Latinx family cohorts in the San Francisco Bay Area from May through September 2020 (N=383 households, 1,875 people). All households were enrolled during pregnancy and postpartum at Zuckerberg San Francisco General Hospital (ZSFG) and UCSF Benioff before the pandemic. For the COVID-19 sub-study, participants responded to a 15-minute telephonic interview where we assessed food consumption patterns, housing and employment status, and history of COVID-19 infection based on community and hospital-based testing. We also evaluated secondhand smoke exposure based on previously collected data. Environmental pollution exposure was determined from census tract residence using California's EnviroScreen 2.0 data. Non-parametric tests were used to assess possible associations and multiple logistic regression analyses to determine independent predictors of COVID-19 infection.

Results: In the combined Latinx, Eating and Diabetes Cohort (LEAD) and Hispanic, Eating and Nutrition (HEN) cohorts there was a 7.6% household infection rate (14/183) with a lower rate of 3.5% (7/200) in the Telomeres at Birth (TAB) cohort. Larger household size increased risk for infection (OR, 1.43 (95%CI 1.10-1.87)) in the combined LEAD/HEN cohorts and increasing number of children trended towards significance in the TAB cohort (OR 1.82, 95% CI 0.98-3.37). Any exposure to secondhand smoke in the household also trended towards increasing risk after adjusting for household size and other exposures (OR 3.20, 95%CI 0.80-12.73) and (OR 4.37, 95% CI 0.80-23.70). We did not find any associations between neighborhood pollution level based on census track and risk of infection. Furthermore, we found weak evidence between dietary exposure and risk of COVID-19 infection after adjusting for possible confounders.

Conclusion: Crowding as indicated by household size increases risk for COVID-19 infection in Latinx families. Exposure to any secondhand smoke may also increase risk for COVID-19 through increased coughing and risk for respiratory impairment. Public policy and health interventions need to ensure that multiunit residential complexes prevent any exposure to secondhand smoke.

## **Background**

### *COVID-19 in USA Latinx*

The novel Coronavirus (COVID-19) has infected over 23.6 million individuals in the United States and more than 394,495 have died due to the infection (Centers for Disease Control and Prevention, 2020). COVID-19 disease disproportionately affects US racial and ethnic minorities (Tai et al., 2020). The Latinx community comprises 18% of the United States population but 33% of the confirmed COVID-19 cases and 20% of all deaths (Rodriguez-Diaz et. al., 2020). Pediatric COVID-19 infection rates are also higher in US racial and ethnic minorities (Ranabothu et al., 2020). As of fall 2020, there were 161,387 school-aged children with COVID-19 in the United States, 42% of whom were Latinx children compared to 32% non-Hispanic White and 17% non-Hispanic Black (Leeb et al. 2020). In California, Latinx's children account for 47.9% of the state's children, yet represent 68.5% of all child COVID-19 cases and 50% of deaths (California Department of Public Health, 2020).

### *Risk Factors in Latinx communities*

Latinxs comprise a large proportion of the country's workforce but hold mostly low-paying employment lacking benefits (Tran, 2019). When COVID-19 shelter-in-place began, 16.2% of Latinx workers had the option to work from home in comparison to the 29.9% of White workers (US Bureau of Labor Statistics, 2019). Household vulnerability can increase the risk of COVID-19 infection based on factors, such as crowding and multi-generational households (Khazanchi et al., 2020). Latinx households in California are more likely to reside in homes with non-family members as compared with non-Latinx households (Latino Caucus, 2017).

### *COVID-19 Environmental and Dietary Factors*

Extended exposure to air pollution, including secondhand smoke, can increase the infection risk and mortality from COVID-19 by compromising respiratory health and increase risk for chronic cough (Costello et. al., 2020; Fell et al., 2018; Roth, 2020; Harvard TH Chan School of Public Health, 2020). Communities of color, including Latinx families, are more likely to be residing in areas of high pollution than White counterparts (American Lung Association, 2020).

Shelter-in-place orders have also adversely impacted global nutritional health as individuals are more likely to be consuming poorer-quality diets and have more unhealthy eating practices (Ghosh, 2020; Khubchandani et al., 2020). Poor nutrition, including low levels of Vitamin D and selenium, can increase susceptibility to illness including potentially risk of novel coronavirus infection (Rhodes et. al, 2020; Bae et al., 2020). Western nutrition consisting of foods high in saturated fats, sugars and refined carbohydrates are harmful as consumption of these foods activates the innate immune system while deactivating the adaptive immune system resulting in inflammation and diminished defense against viruses, including potentially COVID-19 (Butler et. al, 2020).

In the below study, we sought to assess environmental risk factors including secondhand smoke exposure, nutritional health and risk of COVID-19 infection in an urban, inner-city Latinx population.

## **Methods**

### *Recruitment*

Families in the present study are part of three, longitudinal cohort studies: the Hispanic Eating and Nutrition Study (HEN) (original N=201) (Kjaer et al, 2019; Wojcicki et al., 2011), Latinx, Eating, and Diabetes Study (LEAD) (original N=97) (Ville et al., 2017; Wojcicki et al. 2018), and the Telomeres at Birth Study (TAB) (original N= 424). HEN and LEAD mothers were recruited during pregnancy primarily at Zuckerberg San Francisco General Hospital (ZSFG) with a minority from UCSF Benioff whereas TAB participants were recruited in the post-partum unit before hospital discharge (mostly at UCSF Benioff and the remaining at ZSFG). Participants for these three studies have been followed over the course of 13, 8, and 1-2 years, respectively. Specifics of the studies have previously been described in our work (Kjaer et al., 2019; Wojcicki et al., 2011; Ville et al., 2017; Wojcicki et al., 2018).

We contacted participants in HEN, LEAD, and TAB telephonically from May through September 2020 to partake in our COVID-19 sub-study. Participants gave their language preference (Spanish or English) and were told information about the COVID-19 study by the bilingual research coordinators (ME, ADM, and MR) and the principal investigator (JW). Those

who chose to participate gave verbal consent for the 15-minute interview. We assessed COVID-19 symptoms and lab-based testing, food consumption patterns during COVID-19, and current employment and housing status. Participants received a \$15 gift card to Amazon or Target as compensation for study participation. Approval for all aspects of the study was given by the Committee on Human Research (CHR), the UCSF Institutional Review Board.

We used the CalEnviroScreen 3.0 (California Office of Environmental Health Hazard Assessment, 2018) to assess the levels of pollution by census tract in the state of California. Specifically, CalEnviroScreen 3.0 allowed us to determine the California communities disproportionately affected by pollution by examining pollution burden score and percentile.

### *Procedures*

All participants were asked if they had symptoms consistent with COVID-19 from the start of lockdowns in March 2020 until the time of the interview (March-September 2020). COVID-19 symptoms that we asked about included cough, fever, muscle aches, stomach-ache, diarrhea, vomiting, sore throat, shortness of breath, COVID toes or loss of smell or taste.

All participants were asked if anyone in their household had undergone a COVID-19 test at a doctor's office, hospital or testing site. Households were determined to be positive if anyone reported a positive test, and/or symptoms including loss of taste/smell. Other questions concerned household crowding including household size, number of bedrooms and bathrooms, number of household members sharing bedrooms and bathrooms. We also assessed the number of working days each week, and COVID-19 specific questions including the use of face masks and public transportation.

As part of recruitment for all cohorts, we collected maternal primary language use (English, Spanish, or bilingual) and education level (primary or less than a high school diploma, high school diploma, some college or more) upon study entry for each participant. We also annually collected information on exposure to secondhand smoke in the household. We were able to use the address of residence at the time of the COVID-19 questionnaire to find the CalEnviroScreen3.0 score for each participant to identify the extent to participants were

impacted by pollution including PM2.5 exposure, pesticide use, diesel particulate matter and drinking water contamination (California Office of Environmental Health Hazard Assessment, 2018).

### *Statistical Analysis*

We combined HEN and LEAD cohorts for a total of 183 participants for analysis as recruitment specifics and demographics of these cohorts were similar (both recruited at ZSFG primarily with similar exclusion and inclusion criteria)(Kjaer et al., 2019; Wojcicki et al., 2011; Ville et al., 2017; Wojcicki et al., 2018). The TAB cohort was analyzed separately and only participants who identified as Latinx were included in the analysis (n=200). Data was assessed for normality using graphical tests of normality and statistical tests including the Shapiro-Wilk and the Kolmogorov-Smirnov tests. As the data were not normally distributed, we used non-parametric tests of association including the Wilcoxon rank-sum test and the chi-square test to assess measures of association for continuous and categorical data.

Variables that were significant in bivariate analysis at  $p < 0.10$  were included in multivariable analyses. Other variables that have been shown to be associated with COVID-19 infection based on biological plausibility were also included in models even if they did not meet the statistical threshold but approached statistical significance including using public transportation. We ran separate analyses for the HEN/LEAD versus the TAB cohorts. We conducted secondary multivariable analyses for both HEN/LEAD and TAB that included dietary factors that were significant at  $p < 0.20$  as one of our primary outcomes of interest was the relationship between nutritional health and COVID-19 infection. All analyses were conducted using Stata 15.1.

### **Results**

Of these 183 participants in the combined HEN/LEAD cohorts, there were 14 cases (7.6%) of COVID-19 reported. The TAB Cohort had 200 participants but only 7 cases of COVID-19 (3.5%) (Tables 1 and 4).

### *Socio-demographics*

Larger household size was associated with COVID-19 infection in the HEN and LEAD cohorts

6.2±2.7 versus 4.9±1.6 (p=0.02; Table 1). A greater number of individuals sharing a bedroom was also associated with increased risk for infection 2.9±1.5 versus 2.5 ± 1.2 (p=0.03; Table 1). Increasing number of people eating together approached statistical significance for COVID-19 infection (p=0.07; Table 1). For the TAB cohort, a higher number of children in the household was associated with increased risk for infection 3.3±1.3 versus 2.4± 1.1 (p=0.03; Table 4). A greater number of individuals eating together during the daytime was protective against infection (2.7±0.8 versus 3.8±1.2; p=0.01; Table 4). We did not find any association with maternal high school diploma, primarily Spanish language use or Mexican origin (versus Central American or other Hispanic ethnicity) for the HEN and LEAD nor the TAB cohorts.

#### *COVID-19 Practices*

We did not find statistically significant differences between COVID-19 prevention practices, such as wearing masks or not using public transportation, and risk for infection in all of our cohorts (Tables 1 and 4). Having household members who were working outside of the house trended towards statistical significance in the TAB cohort with a higher percentage of those infected working outside the home (100% versus 75.1%; p=0.13; Table 4).

#### *Diet*

We found a higher percentage of fast food consumption ( $\geq 2$ x/month) in HEN/LEAD among those infected with COVID-19 versus not being infected trending toward statistical significance (66.7% versus 39.6%; p=0.07; Table 1). Higher consumption of Mexican tortas (a fast food sandwich) was also greater among those who were infected versus uninfected ( $\geq 2$ x/month), 25.0% versus 10.9%; (p=0.15; Table 1). Beans were consumed more frequently by those families with COVID-19 infection compared to those families without COVID-19 infection (91.7% versus 70.8%; p=0.12; Table 1).

In the TAB cohort, there was a trend towards higher consumption of 100% fruit juice among those infected with COVID-19 versus uninfected although results were not statistically significant (66.7% versus 36.8%; p=0.14; Table 4). Other dietary intake factors including

consumption of fast food, sugar sweetened beverages and 100% fruit juice were not associated with COVID-19 infection.

### *Environmental Pollution*

There was a higher percentage of exposure to secondhand smoke in HEN/LEAD in those families with COVID-19 infection (28.6% versus 18.2% for those uninfected) although the differences were not statistically significant ( $p=0.34$ ; Table 1). We did not find any association between pollution burden score or pollution burden percentile as indicated on the EnviroScreen 3.0 related to COVID-19 infection (Table 1)

In TAB, a higher percentage of those with exposure to secondhand smoke had someone in the household with COVID-19 (42.9% versus 11.4%;  $p=0.01$ ; Table 4). There was also no association between pollution burden score or percentile in TAB as indicated on the EnviroScreen 3.0 and COVID-19 infection (Table 4).

### *Multivariable findings*

Independent predictors for COVID infection in HEN/LEAD include a higher number of household members (OR 1.43, 95% CI 1.06-1.93;  $p=0.02$ ; Table 2). Increased exposure to secondhand smoke trended towards statistical significance after adjusting for other factors including number of household members, number eating together and number sharing a bed together (OR 3.20, 95% CI, 0.80-12.73;  $p=0.099$ ; Table 2).

For the TAB cohort independent predictors for COVID-19 infection included a higher number of household children (OR 1.82, 95% CI 0.98-3.37;  $p=0.06$ ). Exposure to any secondhand smoke trended towards statistical significance (OR 4.37, 95%CI 0.80-23.70;  $p=0.09$ ; Table 5). There was no association between risk of infection and use of public transportation and maternal education after adjusting for exposure to secondhand smoke and number of the children in the household.

We did not find any association between dietary intake including consumption of sugar-sweetened beverages, 100% fruit juice, Mexican tortas and beans with risk for COVID-19

infection after controlling for other risk factors including crowding associated ones and secondhand smoke exposure (Tables 3 and 5).

## **Discussion**

### *Crowding*

We found that previous studies suggest overcrowding in homes impacts health outcomes (Shaw, 2004) including risk for COVID-19 transmission and new infections. Since the start of the pandemic, most transmission of COVID-19 infection occurs in the context of close interpersonal interactions in the home (Rader et. al, 2020). In counties, where there are high levels of overcrowding, there is a strong association between infection of COVID-19 and overcrowding in the home (Richwine et. al, 2020). Overcrowding occurs when there are more people in a home surpassing the home's capacity to supply privacy, shelter, and space as per the WHO definition (WHO Housing and Health Guidelines. Geneva: World Health Organization; 2018). Implications of overcrowding include increased likelihood of infection and a greater prevalence to respiratory ailments (California Department of Public Health, 2021). The most vulnerable populations, including but not limited to individuals with mental illness, chronic health conditions, history of trauma, immigrants, and ethnic minorities, are those most likely to be affected by housing difficulties (Anderson et. al, 2013; Braubach, 2011; Dohler et. al, 2016; Jones, 2010). These are global issues. Similar to US-based studies, black, Asian and ethnic minorities in the United Kingdom with overcrowding issues report increased risk for COVID-19 (Soltan et. al, 2020). Investment in adequate housing in the San Francisco Bay Area could reduce risk for infection in populations, such as Latinx community, that have a higher rate of crowding.

### *Overcrowding Public Health Measures*

Public health measures to reduce overcrowding have traditionally been at the individual level (Shaw, 2004). Interventions need to be in place to minimize the number of contacts people with COVID-19 infection have, particularly household contacts. Other countries have already addressed these issues to limit COVID-19 spread. For instance, in China, the government provides COVID-19 infected individuals with space to quarantine outside the home and access to free meals, internet, and telephone, thus limiting COVID-19 transmission (Lai et. al. 2020). In



California, hotels have been used as temporary housing locations for high-risk populations, including homeless and health care workers at risk of COVID-19 infection but these interventions have not extended to the general population (State of California, 2021).

Enforcing housing guidelines and codes may be a mechanism to address overcrowding and ensure appropriate ventilation in units; however, there must be a safety net to help families if they need to be relocated (Krieger et. al, 2002).

### *Secondhand Smoking (SHS) and Environmental Pollutants*

Secondhand smoke and environment exposures such as pollution can increase risk for respiratory illnesses (San Francisco Tobacco Free Project, 2016; Zeng et. al, 2019). Secondhand smoke consists of more than 7,000 different chemicals from the smoke exhaled by a smoker with smoke from the cigarette (Center for Disease Control, 2020; San Francisco Tobacco Free Project, 2016). In the United States, approximately 40,000 deaths are attributed to secondhand smoke in non-smokers (San Francisco Tobacco Free Project, 2016). We found increased risk associated with exposure to secondhand smoke in both cohorts although there was no association between COVID-19 infection and environmental pollution exposures.

Secondhand smoke facilitates the transmission of COVID-19 as the virus to attach to particles expelled by smokers and travels further distances (Curley, 2020). Viral particles can travel up to six times longer distances than if the virus was simply in the air (Curley, 2020). Furthermore, smokers tend to exhale more forcefully, and COVID-19 infected smokers could have more particles pushed from their lungs and travel greater distances (Ries, 2020). Previous studies have found that Latinx households residing in multi-unit housing were exposed to secondhand smoke at very high levels and did not have a way to protect themselves (Baezconde-Garbanati et. al, 2011). Children are the most vulnerable to secondhand smoke (Zeng et. al, 2019). With pandemic stay-at-home orders underway in the Greater Bay Area, people are in more vulnerable positions to be residing in confined space with a smoker who can be positive for infection and have exposure to COVID-19 via smoking.

### *Nationals Smoking Public Health Measures*

Populations living in densely packed urban areas or in multi-housing units that do not restrict smoking may still be impacted by exposure to secondhand smoke (Pickett et. al, 2006). In California, more than 60 cities and counties have 100% smoke free multi-housing units where smoking is prohibited in privately-owned as well as publicly-owned residences. Bay Area municipalities with 100% smoking free laws include Berkeley, Daly City, Pacifica, and Palo Alto (African American Nonsmokers Foundation, 2020). About two dozen municipalities in California have laws partially restricting smoking in multi-housing units. Municipalities with partial smoking restrictions are less stringent than the 100% smoking free laws as smoking is restricted in some private units of multi-unit housing, yet do not mandate multi-unit homes to be 100% smoke-free (African American Nonsmokers Foundation, 2020). Municipalities in the Bay Area with partial smoking laws include Fremont, Marin County and Pinole (African American Nonsmokers Foundation, 2020). Yet, smoking bans increase non-smokers exposure to secondhand smoke as smokers are more likely to then smoke in private around nonsmokers (Adda et. al, 2010). One successful way of reducing the exposure of secondhand smoke in areas with smoking bans has been having taxes for tobacco be high (Adda et. al, 2010).

Secondhand smoking is a concern in residential housing in San Francisco, where many of our participants live (San Francisco Tobacco Free Project, 2016). In 2010, Health Code Article 19F passed in San Francisco preventing smoking in shared areas in multi-unit buildings but allowing smoking in individual units and outdoors, like on street curbs (San Francisco Tobacco Free Project, 2016). Health Code Article 19F did not apply to private residences or rented units in San Francisco, and Senate Bill-322 permits property owners to prohibit smoking in their units (San Francisco Tobacco Free Project, 2016). The House Smoking Disclosure Ordinance, 19M, which went into effect in 2013 gives tenants in San Francisco the smoking status of their potential unit and surrounding units before signing a lease (San Francisco Tobacco Free Project, 2016). With the growing usage of e-cigarettes, San Francisco has begun prohibiting vaping in any location where there is no usage of traditional cigarettes with the law, SF Health Code Article 19N (2014) as second hand vapor also has respiratory health impacts (San Francisco Tobacco Free Tobacco Laws, 2019).

Unlike other municipalities in California, San Francisco does not have 100% smoking free laws nor partial smoking laws (African American Nonsmokers Foundation, 2020). In December 2020, San Francisco chose to revise Health Code Article 19F, which does not prohibit smoking inside all private dwellings in homes with three or more units (Moench et. al, 2020; San Francisco Board of Supervisors, 2020). Although Senate Bill-322 will continue to allow landlords to place smoking bans, residents in many multi-use units will continue to face exposure to secondhand smoke in the context of COVID-19 exposure (Moench et. al, 2020; San Francisco Board of Supervisors, 2020). Other East Bay and Peninsula cities where our participants reside including Oakland, San Jose and Vallejo do not have any legislation restricting smoking in multi-housing units.

In the context of COVID-19 shelter-in-place mandates, families spend an increased amount of time at home, with a greater risk for second-hand smoke exposure. There is greater urgency to reform smoking and housing laws to protect residents in multi-unit dwellings.

#### *Dietary Risk Factors for COVID-19*

We did not find any statistically significant dietary risk factors for COVID-19 after adjusting for crowding indices and exposure to secondhand smoke. In bivariate analysis, increased consumption of beans/frijoles, Mexican tortas, fast food and 100% fruit juice were associated with increased risk for infection. Individuals consuming beans/frijoles trended towards having COVID-19 infection more frequently than those eating beans with less frequency. Beans are more likely to be incorporated in the diet of individuals who are less socioeconomically privileged than in the diets of people with greater resources (Medina et. al, 2020). The socioeconomic status of Latinx families is usually significantly lower than that of Whites (Morales et. al, 2002). Having beans in the home tends to provide a sense of food security (Khor et. al, 2018). Future studies should investigate possible links between frijoles/bean consumption, food insecurity, and COVID-19 infection.

The novel coronavirus pandemic resulted in changing eating behaviors and decreasing quality of diets in part due to food insecurity (Khumbhandani et. al, 2020). Obesity is a major risk factor for COVID-19 and has shown to increase the risk of infection by 46% and a 48% increase in deaths

(Popkin et al., 2020). For the Latinx community, 44.8% are obese compared to 42.2% of whites (CDC, 2020). Increased adiposity negatively impacts immune function and host defense (Milner et al, 2012).

Limiting sugar consumption can be most beneficial for people with any underlying health issue that are diet-related (Cassata, 2020). For instance, increased blood glucose levels in diabetics increases the severity of the prognosis of COVID-19 (Gianchandani, 2020). Furthermore, the risk for diabetes is 66% higher for the Latinx community compared to their White counterparts due to poor diet, lack of information, or lack of health insurance (Gordon, 2019). Increased blood sugar level for non-diabetics has also been linked to more severe symptoms and poorer outcomes of COVID-19, such as ICU placement, ventilation and death (Isler, 2020).

Community exposure activities, including restaurant or coffee shop dining, increases risk of COVID-19 infection (Fisher et al, 2020). In a study using cellphone data from 10 urban areas, restaurants were one of the riskiest places for COVID-19 transmission (Carey, 2020). Adults testing positive for COVID-19 infection were twice as likely than those who test negative to have dined at a restaurant 14 days before coming ill (Fisher et. al, 2020). In the context of COVID-19 infection, consumption of fast food, such as Mexican tortas, may be synonymous with increased exposure to individuals outside the household or may suggest risk associated with eating at restaurants.

We found no statistically significant relationship between fast food, Mexican tortas and 100% fruit juice consumption and COVID-19 infection, but the families in our cohorts who ate fast food more than twice a month had more COVID-19 infection relative to individuals who ate fast food less frequently. Fast food and 100% fruit juice consumption are also associated with increased risk for overweight and obesity and metabolic disease due to the high amount of sugar and fats in these foods (Janssen et. al, 2018).

### **Limitations and Conclusion**

Limitations of our study included small sample size and relatively small number of COVID-19 infections, particularly in the TAB cohort. We also did not directly test participants for COVID-19 but rather relied on self-reported results including recall of COVID-19 related symptoms. Our assessment of secondhand smoke exposure was only collected annually and not directly before

the start of COVID-19 in some cases and environmental pollutant exposure was based on census tract location, not at the household or individual level. Lastly, we did not directly examine other forms of possible tobacco exposure including the effects of e-cigarettes (vaping) on COVID-19 infections. While the prevalence of cigarette smoking and tobacco products is lower among Latinxs than other racial and ethnic groups, the odds of smoking increases with acculturation among the Latinx community (Centers for Disease Control and Prevention, 2019; Wang et. al, 2019). Future public policy in the San Francisco Bay Area should include measures for housing infrastructure with adequate space and ventilation in all urban areas as well as greater inclusion of all individuals for benefits related to healthcare, like hotel housing following COVID-19 infection. Additionally, policy on secondhand smoke exposure should restrict any exposures in multi-unit dwellings.

## **Acknowledgements**

This project was supported by the generosity of Eric and Wendy Schmidt by recommendation of the Schmidt Futures program, through Covid Catalyst at the Center of Emerging and Neglected Diseases.

## **References**

Adda J, Nornaglia F. The effect of bans and taxes on passive smoking. *Am Econ J Appl Econ* 2010;2(1):1-32.

African American Nonsmokers Association. No-smoke.org. Accessed January 11, 2021. <https://no-smoke.org/wp-content/uploads/pdf/smokefreemuh.pdf>

American Heart Association. Is vaping better than smoking? Heart.org. Accessed January 11, 2018. <https://www.heart.org/en/healthy-living/healthy-lifestyle/quit-smoking-tobacco/is-vaping-safer-than-smoking>

Anderson HS, Turner LM, Soholt S. The special importance of housing policy for ethnic minorities: evidence from comparison of four Nordic countries. *Int J Hous Pol.* 2013 13(1):20-44

Bae M, Kim H. Mini-review on the roles of vitamin C, vitamin D, and selenium in the immune system against COVID-19. *Molecules.* 2020;25(22):5346.

Baezconde-Garbanati LA, Weich-Reushe K, Espinoza L, et al. Secondhand smoke exposure among Hispanic/Latinos living in multiunit housing: exploring barriers to new policies. *Am J Health Promot,* 2011;25(5 Suppl):S82-90.

Braubach M. Key challenges of housing and health from WHO perspective. *Int J Public Health*. 2011;56(6):579-580.

Butler MJ, Barrientos RM. The impact of nutrition on COVID-19 susceptibility and long-term consequences. *Brain Behav Immun*. 2020;87:53-54.

California department of public health. Cdph.ca.gov. Accessed December 9, 2020. <https://www.cdph.ca.gov/Programs/CID/DCDC/Pages/COVID-19/Race-Ethnicity.aspx>

California Office of Environmental Health Hazard Assessment. Oehha.ca.gov. Accessed December 13, 2020. <https://oehha.ca.gov/calenviroscreen/report/calenviroscreen-30>

Carey B. Limiting indoor capacity can reduce Coronavirus infections, study shows. The New York Times. Published November 10, 2020. Accessed January 15, 2021. <https://www.nytimes.com/2020/11/10/health/covid-indoor-venues-infections.html>.

Cassata C. Eating excess sugar is worse for you during COVID-19: 6 ways to cut it. Healthline Media. Published November 6, 2020. Accessed January 13, 2021. <https://www.healthline.com/health-news/eating-excess-sugar-is-worse-for-you-during-covid-19-6-ways-to-cut-it>

Center for Disease Control. Cdc.gov. Accessed December 13, 2020. [https://www.cdc.gov/tobacco/data\\_statistics/sgr/50th-anniversary/pdfs/fs\\_smoking\\_overall\\_health\\_508.pdf](https://www.cdc.gov/tobacco/data_statistics/sgr/50th-anniversary/pdfs/fs_smoking_overall_health_508.pdf)

Center for Disease Control. Cdc.gov. Accessed December 13, 2020. [https://covid.cdc.gov/covid-data-tracker/#cases\\_casesper100klast7days](https://covid.cdc.gov/covid-data-tracker/#cases_casesper100klast7days)

Center for Disease Control. Hispanic/Latinos and tobacco use. Cdc. Gov. Published December 11, 2019. Accessed January 12, 2021. <https://www.cdc.gov/tobacco/disparities/hispanics-latinos/index.htm>

Center for Disease Control and Prevention. CDC. COVID-19 cases, deaths, and trends in the US. Cdc.gov. Published March 28, 2020. Accessed December 3, 2020. <https://covid.cdc.gov/covid-data-tracker/>

Coronavirus and Air Pollution. C-CHANGE | Harvard T.H. Chan School of Public Health. <https://www.hsph.harvard.edu/c-change/subtopics/coronavirus-and-pollution/>. Published November 10, 2020. Accessed November 22, 2020.

Costello AP, Huber AJ, MacCormick AH, Benzkofer AS. Why air pollution is linked to severe cases of COVID-19. Scope. <https://scopeblog.stanford.edu/2020/07/17/why-air-pollution-is-linked-to-severe-cases-of-covid-19/>. Published July 22, 2020. Accessed November 22, 2020.

Curley B. Can secondhand smoke transmit the novel Coronavirus? Healthline Media. Published August 18, 2020. Accessed January 14, 2021. <https://www.healthline.com/health-news/can-secondhand-smoke-transmit-the-novel-coronavirus>

Disparities in the Impact of Air Pollution. American Lung Association. <https://www.lung.org/clean-air/outdoors/who-is-at-risk/disparities>. Published April 20, 2020. Accessed November 24, 2020.

Dohler E, Bailey P, Rice D, Katch H. Supportive housing helps vulnerable people live and thrive in the community. Cbpp.org. Published May 31, 2016. Accessed January 13, 2021. <https://www.cbpp.org/research/housing/supportive-housinghelps-vulnerable-people-live-and-thrive-in-the-community>

Fell AKM, Svendsen MV, Kim J-L, et al. Exposure to second-hand tobacco smoke and respiratory symptoms in non-smoking adults: cross-sectional data from the general population of Telemark, Norway. *BMC Public Health*. 2018;18(1). doi:10.1186/s12889-018-5771-4

Fisher KA, Tenforde MW, Feldstein LR, et al. Community and close contact exposures associated with COVID-19 among symptomatic adults > 18 years in 11 outpatient healthcare facilities-United States, July 2020. *MMWR Morb Mortal Wkly Rep*. 2020;69(36):1258-1264

Ghosh A, Arora B, Gupta R, Anoop S, Misra A. Effects of nationwide lockdown during COVID-19 epidemic on lifestyle and other medical issues of patients with type 2 diabetes in north India. *Diabetes Metab Syndr*. 2020;14(5):917-920.

Gianchandani R, Esfandiari NH, Ang L, et al. Managing hyperglycemia in the COVID-19 inflammatory storm. *Diabetes*. 2020;69(10):2048-2053.

Gordon S. Why diabetes is worse for Latinos and African Americans. Healthgrades. Published April 6, 2019. Accessed January 15, 2021. <https://www.healthgrades.com/right-care/diabetes/why-diabetes-is-worse-for-latinos-and-african-americans>

Isler A. High blood sugar can increase COVID-19 risk, even without diabetes. Verywellhealth.com. Accessed January 15, 2021. <https://www.verywellhealth.com/high-blood-sugar-increase-severity-covid-19-5090003>

Janssen HG, Davies IG, Richardson LD, Stevenson L. Determinants of takeaway and fast food consumption: a narrative review. *Nutr Res Rev*. 2018;31(1):16-34.

Jones A. Org.uk. Accessed January 13, 2021. <https://raceequalityfoundation.org.uk/wp-content/uploads/2018/02/housing-brief16.pdf>

Khazanchi R, Beiter ER, Gondi S, Beckman AL, Bilinski A, Ganguli I. County-level association of social vulnerability with COVID-19 cases and deaths in the USA. *J Gen Intern Med*. 2020;35(9):2784-2787

Khor LY, Zeller M, Khor LY, Zeller M. Storing a staple crop for own consumption: Linkages to food security. Published online 2018. doi:10.22004/AG.ECON.277244

Khubchandani J, Kandiah J, Saiki D. The COVID-19 pandemic, stress, and eating practices in the United States. *Eur J Investig Health Psychol Educ*. 2020;10(4):950-956.

Kjaer TW, Faurholt-Jepsen D, Medrano R, et al. Higher birthweight and maternal pre-pregnancy BMI persist with obesity association at age 9 in high risk Latino children. *J Immigr Minor Health*. 2019;21(1):89-97.

Krieger J, Higgins DL. Housing and health: time again for public health action. *Am J Public Health*. 2002;92(5):758-768.

Lai S, Ruktanonchai NW, Zhou L, et al. Effect of non-pharmaceutical interventions to contain COVID-19 in China. *Nature*. 2020;585(7825):410-413.

Latino Caucus. Legislature.ca.gov. Accessed January 15, 2021. <https://latinocaucus.legislature.ca.gov/sites/latinocaucus.legislature.ca.gov/files/forms/Statistical%20Picture%20of%20Latinos%20in%20California%20-%202017%20Update.pdf>

Leeb RT, Price S, Sliwa S, et al. COVID-19 trends among school-aged children — United States, march 1–September 19, 2020. *MMWR Morb Mortal Wkly Rep*. 2020;69(39):1410-1415.

Medina LPB, Barros MBA, Barros Filho AA. Social inequalities in the consumption of beans and other legumes: a study with adults from Brazil. *Eur J Public Health*. 2020;30(Supplement\_5). doi:10.1093/eurpub/ckaa166.325

Milner JJ, Beck MA. The impact of obesity on the immune response to infection. *Proc Nutr Soc*. 2012;71(2):298-306

Moench M. S.F. reverses course on tobacco smoking ban inside apartment buildings, seeks more review. Published December 9, 2020. Accessed January 11, 2021. *Chronicle*. <https://www.sfchronicle.com/bayarea/article/S-F-reverses-course-on-tobacco-smoking-ban-15785819.php>.

Morales LS, Lara M, Kington RS, Valdez RO, EscarceJJ. Socioeconomic, cultural, and behavioral factors affecting Hispanic health outcomes. *J Health Care Poor Underserved*. 2002;13(4):477-503.

Pickett MS, Schober SE, Brody DJ, Curtin LR, Giovino GA. Smoke-free laws and secondhand smoke exposure in US non-smoking adults, 1999-2002. *Tob Control*. 2006;15(4):302-307.



Popkin BM, Du S, Green WD, et al. Individuals with obesity and COVID-19: A global perspective on the epidemiology and biological relationships. Wiley Online Library. <https://onlinelibrary.wiley.com/doi/10.1111/obr.13128>. Published August 26, 2020. Accessed November 9, 2020

Rader B, Scarpino SV, Nande A, et al. Crowding and the shape of COVID-19 epidemics. *Nat Med*. 2020;26(12):1829-1834.

Ranabothu S, Onteddu S, Nalleballe K, Dandu V, Veerapaneni K, Veerapandiyani A. Spectrum of COVID-19 in children. *Acta Paediatr*. 2020;109(9):1899-1900.

*Report of the Systematic Review on the Effect of Household Crowding on Health*. World Health Organization; 2018.

Rhodes J, Dunstan F, Laird E, Subramanian S, Kenny RA. COVID-19 mortality increases with northerly latitude after adjustment for age suggesting a link with ultraviolet and vitamin D. *BMJ Nutr Prev Health*. 2020;3(1):118-120.

Richwine J, Caramota SA, Zeigler K. Household overcrowding facilitates the spread of COVID-19. Cis.org. Accessed January 13, 2021. <https://cis.org/Richwine/Household-Overcrowding-Facilitates-Spread-Covid19>

Ries J. People without symptoms carry just as much of the Coronavirus as symptomatic people. Healthline Media. Published August 10, 2020. Accessed January 13, 2021. <https://healthline.com/health-news/people-without-symptoms-carry-just-as-much-covid-19-as-symptomatic-people>

Rodriguez-Diaz CE, Guilamo-Ramos V, Mena L, et al. Risk for COVID-19 infection and death among Latinos in the United States: examining heterogeneity in transmission dynamics. *Ann Epidemiol*. Published online 2020. doi:10.1016/j.annepidem.2020.07.007

Roth S. These maps show how air pollution and COVID-19 can be a deadly mix. Los Angeles Times. <https://www.latimes.com/environment/newsletter/2020-10-08/boiling-point-air-pollution-and-covid-19-can-be-a-deadly-mix-boiling-point>. Published October 8, 2020. Accessed November 22, 2020.

San Francisco Board of Supervisors Agenda Packet Contents List. Committee/board of supervisors. Legistar.com. Accessed January 12, 2021. <https://sfgovlegistar.com/View.ashx?M=F&ID8961284&GUID=6376DF5F-B97D-46ED-BE97-477453769011>

Shaw M. Housing and public health. *Annu Rev Public Health*. 2004;25(1):397-418.

Smoke free housing. Sanfranciscotobaccofreeproject.org Accessed January 12, 2021. <https://sanfranciscotobaccofreeproject.org/housing>

State of California. Housing and homelessness. Covid19.ca.gov. Accessed January 3, 2021. <https://covid19.ca.gov/housing-and-homelessness/>

Soltan M, Crowley LE, Melville CR, et al. To what extent are social determinants of health, including household overcrowding, air pollution and housing quality deprivation, modulators of presentation, ITU admission and outcomes among patients with SARS-COV-2 infection in an urban catchment area in Birmingham, United Kingdom? Published online 2020. doi:10.21203/rs.3.rs-35617/v1

Tai DBG, Shah A, Doubeni CA, Sia IG, Wieland ML. The disproportionate impact of COVID-19 on racial and ethnic minorities in the United States. *Clin Infect Dis*. Published online 2020. doi:10.1093/cid/ciaa815

Tran J. Reducing health disparities among Latino/Hispanic populations in the US. In: *Annual Undergraduate Conference on Health and Society*. ; 2019.

US Bureau of Labor Statistics. Job flexibilities and work schedules—2017-2018 data from the American Time Use Survey [press release]. <https://www.bls.gov/news.release/flex2.nr0.htm>. Published September 24, 2019. Accessed November 30, 2020.

Ville AP, Heyman MB, Medrano R and JM Wojcicki. Early Antibiotic Exposure and Risk of Childhood Obesity in Latinos. *Childhood Obesity* 2017; 13(2): <https://doi.org/10.1089/chi.2016.0235>.

Wang Y, Laestadius L, Stimpson JP, Wilson FA. Association between E-cigarette use and acculturation among adult immigrants in the United States. *Subst Abuse*. 2019; 13:117822181985586

Wojcicki JM, Holbrook K, Lustig RH, Epel E, Caughey AB, Munoz RF, Shiboski SC and MB Heyman. Chronic Maternal Depression is Associated with Reduced Weight Gain in Latino Infants from Birth to 2 Years. *PLOS One* 2011; 6(2): e16737

Wojcicki JM, Medrano R, Lin J, Epel E. Increased Cellular Aging by 3 Years of Age in Latino, Preschool Children Who Consume More Sugar-Sweetened Beverages. *Child Obes* 2018 Apr 1;14(3): 149–157.

Zeng, S, Noguchi H, Shimokawa S. Partial smoking ban and secondhand smoke exposure in Japan. *Int J Environ Res Public Health*. 2019 16(15):2804.

**Table 1: Family Demographics, Diet and COVID-19 Infection  
(LEAD and HEN Cohorts)**

|                                           | <b><u>Infected (COVID-19)</u></b><br>(14/183; 7.6%) | <b><u>Not Infected (COVID-19)</u></b> <b><u>p value</u></b><br>(169/183; 92.4%) |      |
|-------------------------------------------|-----------------------------------------------------|---------------------------------------------------------------------------------|------|
| <i><u>Demographics</u></i>                |                                                     |                                                                                 |      |
| Household Size                            | 6.2±2.7                                             | 4.9±1.6                                                                         | 0.02 |
| Number of Children                        | 3.9±1.1                                             | 2.8±1.2                                                                         | 0.47 |
| Number Sharing<br>Bedroom                 | 2.9±1.5                                             | 2.5±1.2                                                                         | 0.03 |
| Number Sharing<br>Bathroom                | 4.8±1.3                                             | 4.0±1.7                                                                         | 0.40 |
| Number<br>Eating Together                 | 4.6±1.8                                             | 4.1±1.4                                                                         | 0.07 |
| Maternal high<br>school diploma           | (7/14; 50%)                                         | (95/164; 57.9%)                                                                 | 0.57 |
| Spanish Language<br>(primary)             | (13/14; 92.9%)                                      | (154/168; 91.7%)                                                                | 0.88 |
| Mexican origin                            | (8/14; 57.1%)                                       | (95/169; 56.2%)                                                                 | 0.95 |
| <i><u>COVID practices</u></i>             |                                                     |                                                                                 |      |
| Wearing Masks<br>(always)                 | (13/13; 100%)                                       | (154/162; 95.1%)                                                                | 0.41 |
| Using Public<br>Transportation<br>(Never) | (12/13; 92.3%)                                      | (127/162; 78.4%)                                                                | 0.23 |
| Household Member<br>Working               | (9/13; 69.2%)                                       | (93/156; 59.6%)                                                                 | 0.50 |
| <i><u>Diet</u></i>                        |                                                     |                                                                                 |      |

|                                                                |                   |                   |      |
|----------------------------------------------------------------|-------------------|-------------------|------|
| Fast food<br>( $\geq 2x$ per month)                            | (8/12; 66.7%)     | (59/149; 39.6%)   | 0.07 |
| Tortas<br>( $\geq 2x$ per month)                               | (3/12; 25%)       | (16/147; 10.9%)   | 0.15 |
| Sugar Sweetened<br>Beverages ( $\geq 1x$ /week)                | (6/12; 50%)       | (82/148; 55.4%)   | 0.71 |
| Beans/Frijoles<br>( $> 1x$ /week)                              | (11/12; 91.7%)    | (104/147; 70.8%)  | 0.12 |
| 100% Fruit Juice<br>( $\geq 1x$ /week)                         | (7/12; 58.3%)     | (87/147; 59.2%)   | 0.95 |
| <u>Pollution</u>                                               |                   |                   |      |
| Exposure to secondhand<br>smoke or someone smoking<br>In house | (4/14; 28.6%)     | (30/165; 18.2%)   | 0.34 |
| EnviroScreen 3.0<br>Pollution Burden Score                     | (4.4 $\pm$ 0.9)   | (4.7 $\pm$ 1.2)   | 0.32 |
| EnviroScreen 3.0<br>Pollution Burden Percentile                | (35.3 $\pm$ 18.2) | (42.1 $\pm$ 23.6) | 0.31 |

**Table 2: Independent Household Predictors for COVID-19 Infection: Multivariable Logistic Regression**

|                                  | Odds Ratio (95% Confidence Interval), p-value |
|----------------------------------|-----------------------------------------------|
| Household number                 | 1.43 (1.06-1.93) 0.02                         |
| Number sharing bedroom           | 1.03 (0.66-1.60) 0.90                         |
| Number eating together           | 1.10 (0.79-1.55) 0.57                         |
| Any exposure to secondhand smoke | 3.20 (0.80-12.73) 0.099                       |
| Public transportation use (any)  | 0.38 (0.05-3.23) 0.38                         |

**Table 3: Dietary Predictors for COVID-19 Infection: Multivariable Logistic Regression**

|                                  | Odds Ratio (95% Confidence Interval), p-value |
|----------------------------------|-----------------------------------------------|
| Household number                 | 1.43 (1.10-1.87) <0.01                        |
| Any exposure to secondhand smoke | 3.07 (0.62-15.08) 0.17                        |

|                                                |                   |      |
|------------------------------------------------|-------------------|------|
| High tortas consumption ( $\geq 2x/mo$ )       | 2.38 (0.59-9.60)  | 0.22 |
| High fastfood consumption ( $\geq 2x/mo$ )     | 4.07 (0.53-31.24) | 0.18 |
| High beans/frijoles consumption ( $>1x/week$ ) | 3.13 (0.54-18.17) | 0.20 |

**Table 4 : Family Demographics, Diet and COVID-19 Infection (TAB Cohort)**

|                                              | <b><u>Infected (COVID-19)</u></b><br>(7/200; 3.5%) | <b><u>Not Infected (COVID-19)</u></b> p value<br>(193/200; 96.5%) |      |
|----------------------------------------------|----------------------------------------------------|-------------------------------------------------------------------|------|
| <i><u>Demographics</u></i>                   |                                                    |                                                                   |      |
| Household Size                               | 5.4 $\pm$ 1.7                                      | 4.7 $\pm$ 1.7                                                     | 0.17 |
| Number of Children                           | 3.3 $\pm$ 1.3                                      | 2.4 $\pm$ 1.1                                                     | 0.03 |
| Number Sharing Bedroom                       | 2.3 $\pm$ 0.4                                      | 2.5 $\pm$ 1.0                                                     | 0.83 |
| Number Sharing Bathroom                      | 4.0 $\pm$ 1.0                                      | 3.4 $\pm$ 1.7                                                     | 0.14 |
| Number Eating Together                       | 2.7 $\pm$ 0.8                                      | 3.8 $\pm$ 1.2                                                     | 0.01 |
| Maternal high school diploma (yes versus no) | (4/7; 57.1%)                                       | (157/193; 81.4%)                                                  | 0.11 |
| Spanish Language (primary)                   | (3/7; 42.9%)                                       | (74/192; 38.5%)                                                   | 0.82 |
| <i><u>COVID practices</u></i>                |                                                    |                                                                   |      |
| Wearing Masks (always)                       | (7/7; 100%)                                        | (180/193; 93.3%)                                                  | 0.48 |
| Using Public Transportation (Never)          | (5/7; 71.4%)                                       | (172/193; 89.1%)                                                  | 0.15 |
| Household Member                             | (7/7; 100%)                                        | (145/193; 75.1%)                                                  | 0.13 |

Working/Employed

Diet

|                                                 |              |                  |      |
|-------------------------------------------------|--------------|------------------|------|
| Fast food<br>( $\geq 2x$ per month)             | (0/6; 0%)    | (39/193; 20.2%)  | 0.22 |
| Tortas<br>( $\geq 2x$ per month)                | (0/6; 0%)    | (18/193; 9.3%)   | 0.43 |
| Sugar Sweetened<br>Beverages ( $\geq 1x$ /week) | (1/6; 16.7%) | (32/193; 16.6%)  | 1.00 |
| Beans/Frijoles<br>( $> 1x$ /week)               | (4/6; 66.7%) | (115/193; 59.6%) | 0.73 |
| High juice<br>( $\geq 1x$ /week)                | (4/6; 66.7%) | (71/193; 36.8%)  | 0.14 |

Pollution

|                                                                |                 |                 |      |
|----------------------------------------------------------------|-----------------|-----------------|------|
| Exposure to secondhand<br>smoke or someone smoking<br>In house | (3/7; 42.9%)    | (22/193; 11.4%) | 0.01 |
| EnviroScreen 3.0<br>Pollution Burden Score                     | 38.4 $\pm$ 11.8 | 34.7 $\pm$ 10.1 | 0.39 |
| EnviroScreen 3.0<br>Pollution Burden Percentile                | 43.1 $\pm$ 28.5 | 33.3 $\pm$ 28.8 | 0.39 |

**Table 5: Independent Household Predictors for COVID-19 Infection: Multivariable Logistic Regression (n=200)**

|                                  | Odds Ratio (95% Confidence Interval), p-value |
|----------------------------------|-----------------------------------------------|
| Number of children in house      | 1.82 (0.98-3.37) 0.06                         |
| Mother has high school diploma   | 0.45 (0.08-1.60) 0.35                         |
| Any exposure to secondhand smoke | 4.37 (0.80-23.70) 0.09                        |
| Public transportation use (any)  | 2.36 (0.32-17.26) 0.40                        |

**Table 6: Dietary Predictors for COVID-19 Infection: Multivariable Logistic Regression (n=199)**

|                                  | Odds Ratio (95% Confidence Interval), p-value |      |
|----------------------------------|-----------------------------------------------|------|
| Number of children in house      | 1.58 (0.86-2.92)                              | 0.14 |
| Any exposure to secondhand smoke | 4.06 (0.67-24.70)                             | 0.13 |
| High juice consumption           | 3.12 (0.54-18.11)                             | 0.21 |
